# Supplementary material for: Dynamics of the perception and EEG signals triggered by tonic warm and cool stimulation
Source: PubMed Central journal article supplement (PMC7179871; doi:10.1371/journal.pone.0231698), 2020-04-23
Supplement: pone.0231698.s002.pdf [file pone.0231698.s002.pdf]

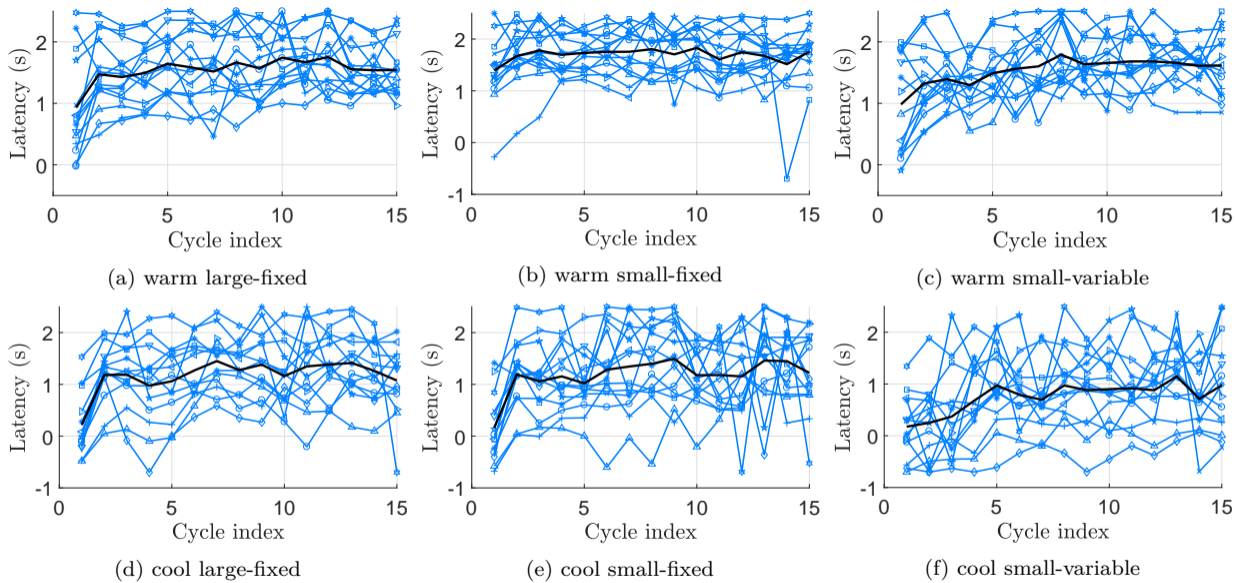

**S2 Fig. Individual latencies of the rating peaks across cycles.** Latency between the temperature and rating peaks as a function of the cycle index, for the warm (top row) and cool (bottom row) stimulation. The grand average is in black.
